# Supplementary material
Source: PubMed Central journal article supplement (PMC2528122)

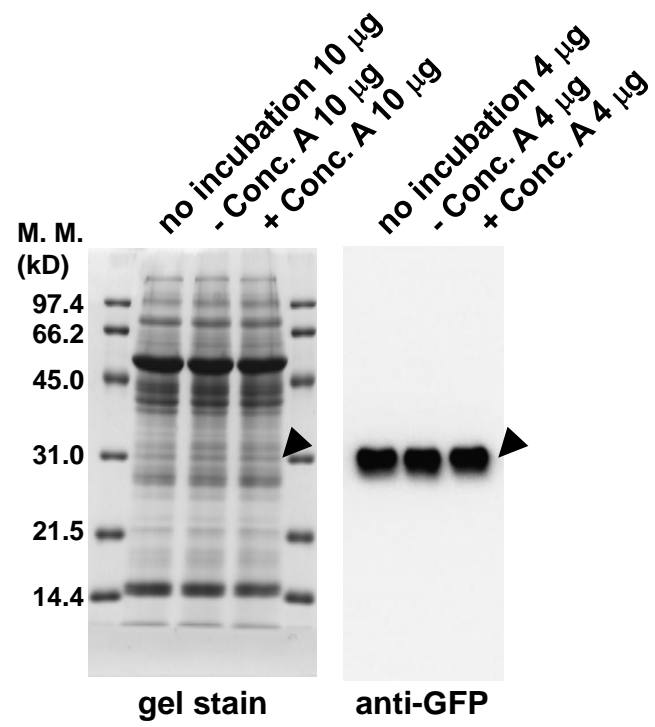

Supplement: pp.108.122770_1.pdf [file pp.108.122770_1.pdf]

**A. Root plastids of CT-GFP**

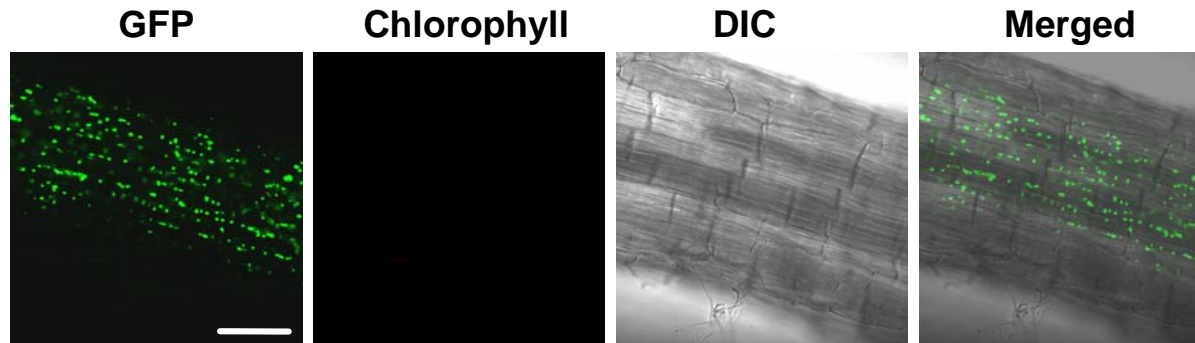

**B. Wild-type Chloroplasts**

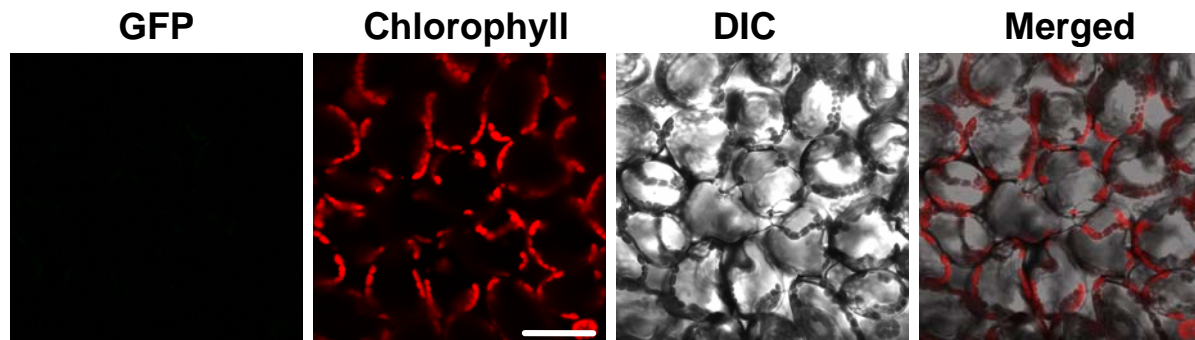

Supplement: pp.108.122770_2.pdf [file pp.108.122770_2.pdf]
